# Supplementary material for: A new microporous 12-ring zincosilicate THK-2 with many terminal silanols characterized by automated electron diffraction tomography
Source: Royal Society of Chemistry journal article supplement (doi:10.1039/d0dt02290j), 2020-01-01
Supplement: d0dt02290j1.pdf [file d0dt02290j1.pdf]

Supplementary information of

# **A new microporous 12-ring zincosilicate THK-2 with many terminal silanols characterized by automated electron diffraction tomography**

Yasuhiro Sakamoto<sup>1,2</sup>, Haishuang Zhao<sup>3</sup>, Hermann Gies<sup>4</sup>, Katsutoshi Yamamoto<sup>5</sup>, Ute Kolb<sup>3,\*</sup>,  
and Takuji Ikeda<sup>6,\*</sup>

<sup>1</sup>*Department of Physical Science, Graduate School of Science, Osaka Prefecture University, 1-1 Gakuen-cho, Naka-ku, Sakai, 599-8531, Japan*

<sup>2</sup>*PRESTO, Japan Science and Technology Agency (JST), 4-1-8 Honcho, Kawaguchi, 332-0012, Japan*

<sup>3</sup>*Institute of Inorganic Chemistry and Analytical Chemistry, Duesbergweg 10–14, Johannes Gutenberg-University Mainz, 55128 Mainz, Germany*

<sup>4</sup>*Institute for Geology, Mineralogy and Geophysics, Ruhr-University Bochum, 44780 Bochum, Germany*

<sup>5</sup>*Faculty of Environmental Engineering, The University of Kitakyushu, 1-1 Hibikino, Wakamatsu-ku, Kitakyushu 808-0135, Japan*

<sup>6</sup>*Research Institute for Chemical Process Technology, National Institute of Advanced Industrial Science and Technology (AIST), 4-2-1 Nigatake, Sendai, 983-8551, Japan*

\*Corresponding authors: Takuji Ikeda (T.I), Ute Kolb (U.K)

E-mail: takuji-ikeda@aist.go.jp (T.I), kolb@uni-mainz.de (U.K)

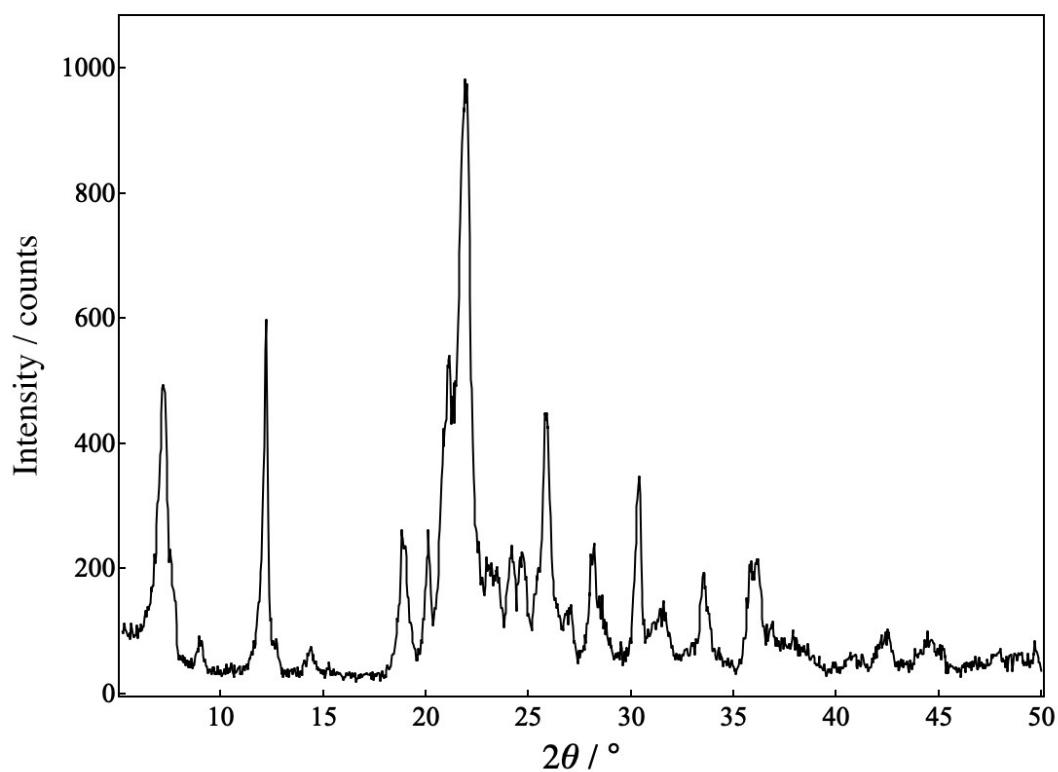

**Figure S1.** Powder XRD pattern of as-synthesized THK-2 without acetic acid washing.

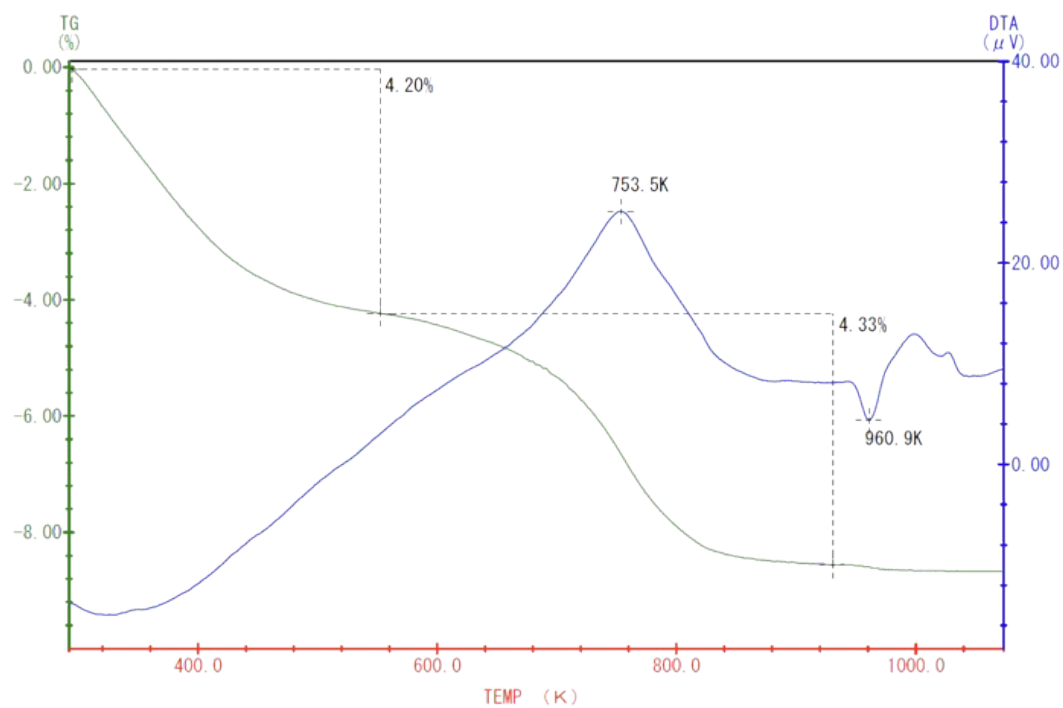

**Figure S2.** TG-DTA profiles of as-synthesized THK-2 in a temperature range of 292–1073 K.

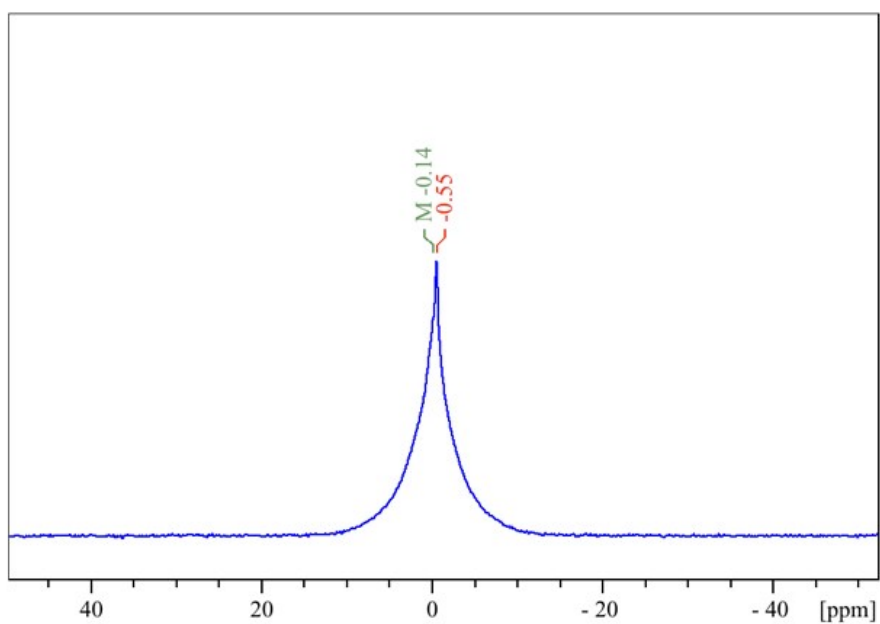

**Figure S3.**  $^7\text{Li}$  MAS NMR spectra of as-synthesized THK-2 after HCl treatment (using 1 mM aqueous solution for 1 h at room temperature).

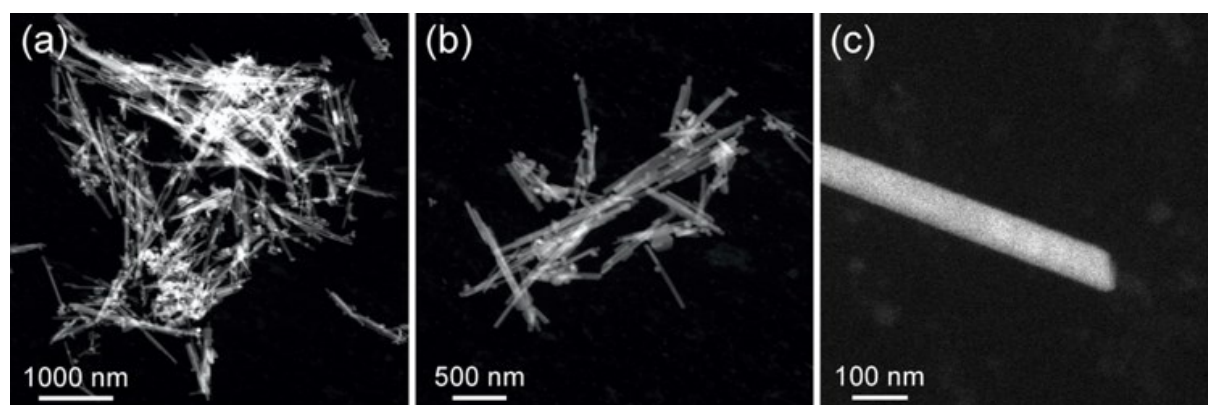

**Figure S4.** STEM images of cal-THK-2 (overview: a–b; c: single nano crystal).

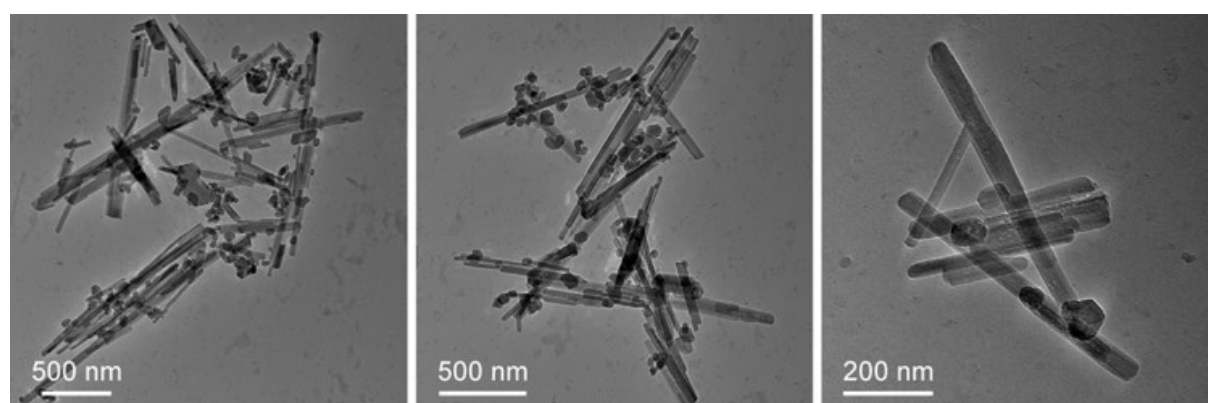

**Figure S5.** TEM images of cal-THK-2.

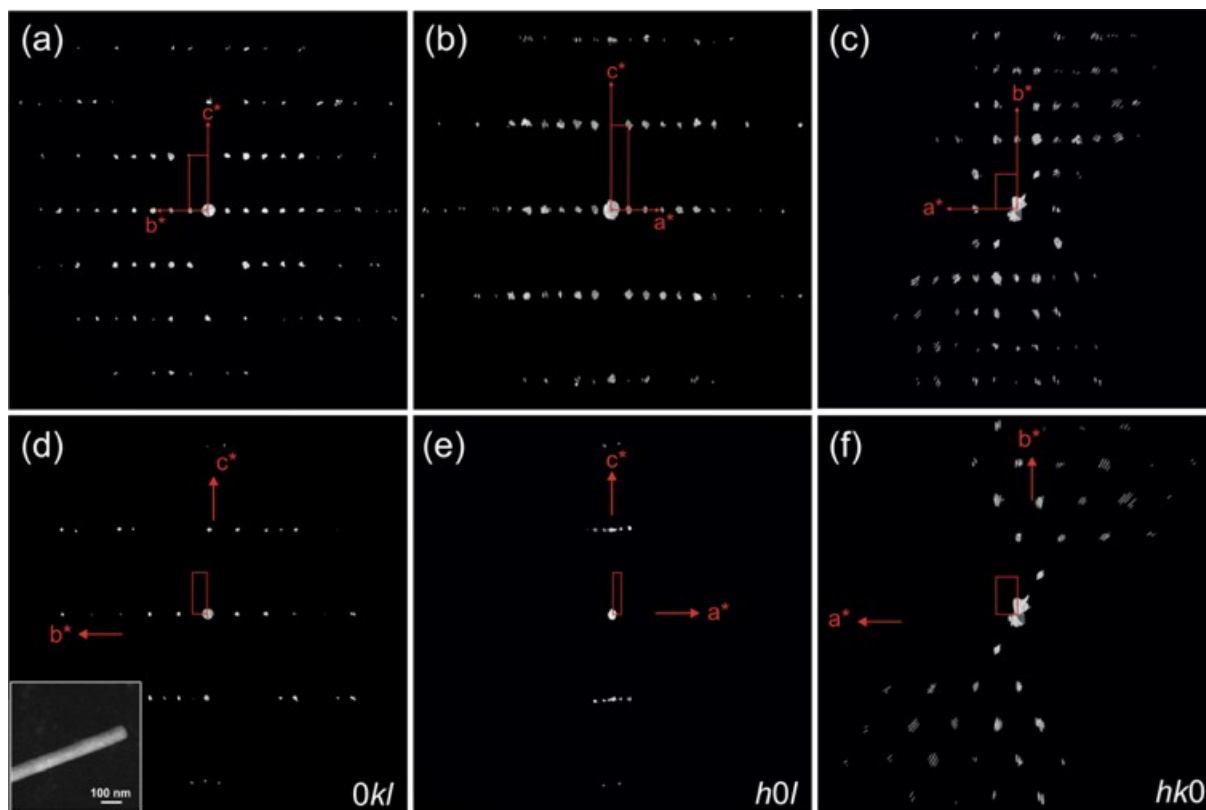

**Figure S6.** Reconstructed 3D diffraction volumes of cal-THK-2 (Cry2) obtained from ADT data viewed down the three main axis (a–c). 2D slices cut from reconstructed 3D reciprocal space corresponding to  $0kl$  (d),  $h0l$  (e) and  $hk0$  (f) planes. The crystal selected for the acquisition of ADT data is shown as an inset in (d).

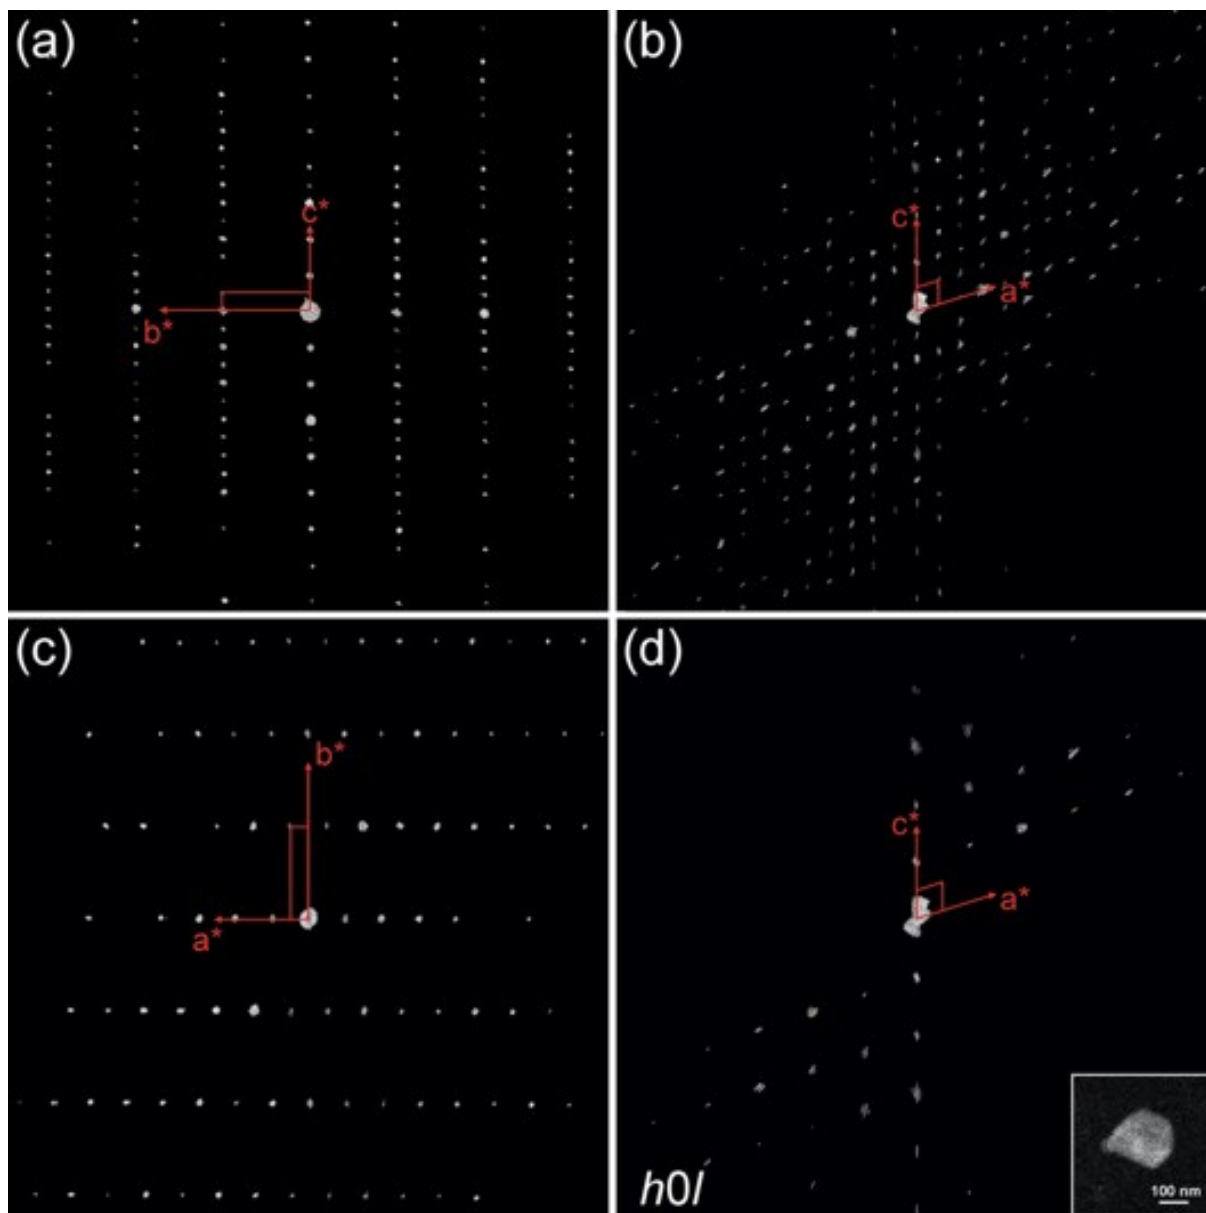

**Figure S7** (a–c) Reconstructed 3D diffraction volumes of MTW obtained from ADT data viewed down the three main directions. A  $C$ -centred unit-cell ( $h + l = 2n$  for  $hkl$ ) can be observed from the diffraction volume viewed down  $c^*$  direction in (c). (d) 2D slice of  $h0l$  plane cut from reconstructed 3D reciprocal space. The reflection condition:  $h = 2n$  and  $l = 2n$  for  $h0l$  plane. The selected crystal for the acquisition of ADT data is shown as an inset in (d).

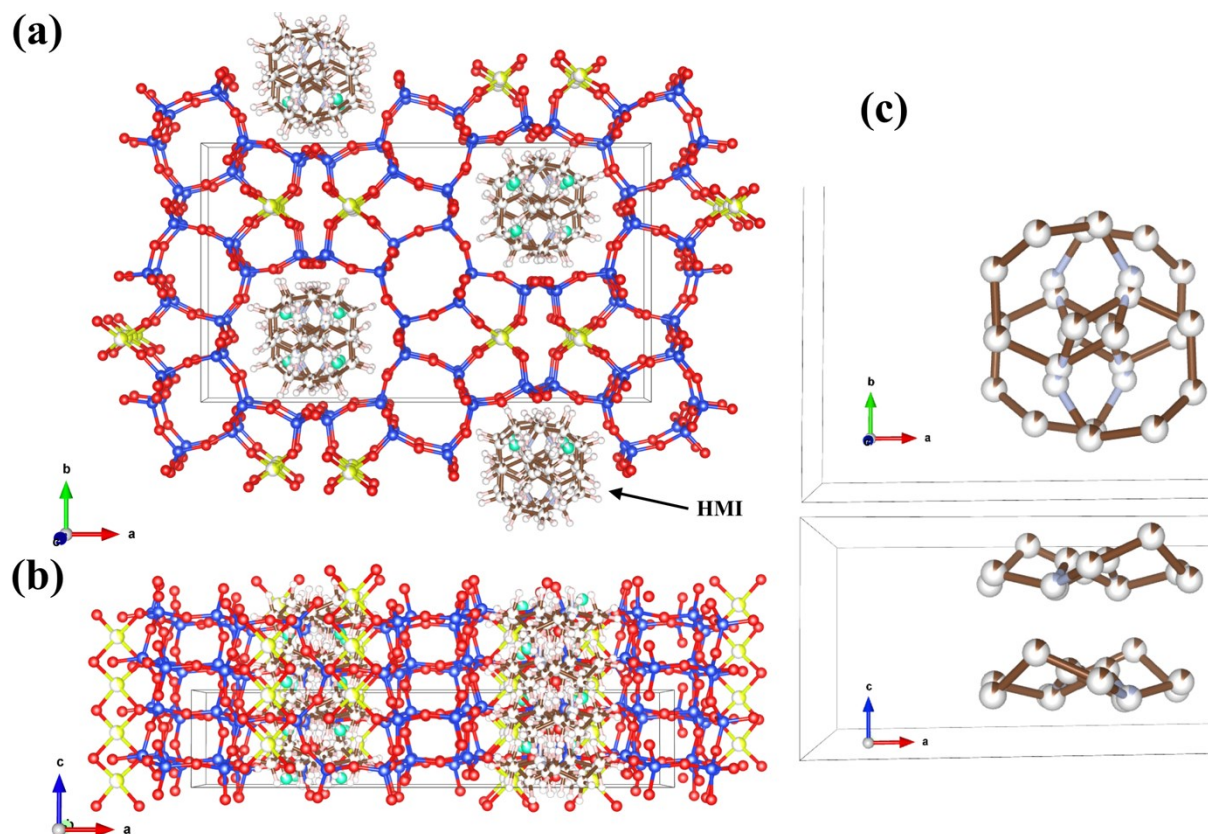

**Figure S8.** Refined crystal structure model of as-synthesized THK-2 viewed along (a) [001] and (b) [010] directions. Blue, red, yellow and green spheres indicate Si, O, Zn and H<sub>2</sub>O positions, respectively. (c) four equivalent HMI arrangement in a one 12-ring channel.

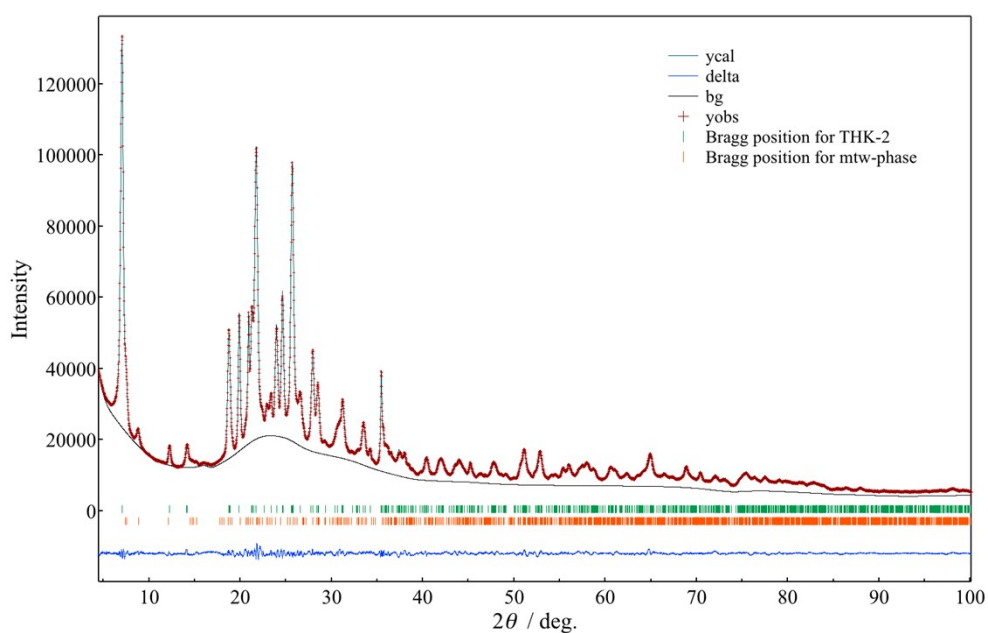

**Figure S9.** Observed, calculated and difference patterns, and background obtained by the Rietveld refinement for as-synthesized THK-2.

## The structural information of cal-THK-2 in CIF format.

```

#####
# CRYSTAL DATA
#-----
data_VESTA_phase_1

  _chemical_name_common          'cal-THK-2'
  _cell_length_a                 24.806(1)
  _cell_length_b                 14.3761(7)
  _cell_length_c                 5.0368(1)
  _cell_angle_alpha              90
  _cell_angle_beta               90
  _cell_angle_gamma              90
  _cell_volume                   1796.1(1)
  _space_group_name_H-M_alt      'P c c n'
  _space_group_name_Hall         '-P 2ab 2ac'
  _space_group_IT_number         56

loop_
  _space_group_symop_operation_xyz
    'x, y, z'
    '-x, -y, -z'
    '-x+1/2, -y+1/2, z'
    'x+1/2, y+1/2, -z'
    '-x, y+1/2, -z+1/2'
    'x, -y+1/2, z+1/2'
    'x+1/2, -y, -z+1/2'
    '-x+1/2, y, z+1/2'

loop_
  _atom_site_label
  _atom_site_fract_x
  _atom_site_fract_y
  _atom_site_fract_z
  _atom_site_occupancy
  _atom_site_symmetry_multiplicity
  _atom_site_Wyckoff_symbol
  _atom_site_adp_type
  _atom_site_U_iso_or_equiv
  _atom_site_type_symbol
Si1  0.9540(4)  0.6879(7)  0.759(4)  1          8 e Uiso  0.0262(6)  Si
Si2  0.0708(3)  0.6007(9)  0.712(3)  1          8 e Uiso  0.0262(6)  Si
Si3  0.8968(4)  0.5078(7)  0.788(3)  1          8 e Uiso  0.0262(6)  Si
Si4  0.7821(4)  0.4179(6)  0.821(3)  1          8 e Uiso  0.0262(6)  Si
O1   0.9067(7)  0.615(1)   0.727(5)  1          8 e Uiso  0.035(1)   O
O2   0.7959(6)  0.310(1)   0.797(5)  1          8 e Uiso  0.035(1)   O
O3   0.8326(8)  0.487(1)   0.772(5)  1          8 e Uiso  0.035(1)   O
O4   0.0115(9)  0.641(1)   0.737(6)  1          8 e Uiso  0.035(1)   O
Zn1  0.8366(8)  0.241(2)   0.538(6)  0.2605     8 e Uiso  0.053(7)   Zn
O5   0.1116(8)  0.686(1)   0.705(5)  1          8 e Uiso  0.035(1)   O
O6   0.767(1)   0.433(1)   0.124(6)  1          8 e Uiso  0.035(1)   O
O7   0.915(1)   0.478(2)   0.078(5)  1          8 e Uiso  0.035(1)   O
O8   0.928(1)   0.451(2)   0.566(5)  1          8 e Uiso  0.035(1)   O
O9   0.9424(8)  0.764(2)   0.537(8)  1          8 e Uiso  0.035(1)   O
WO1  0.235(3)   0.197(5)   0.28(1)   0.32(3)    8 e Uiso  0.03(1)    O
WO2  0.266(5)   0.142(9)   0.28(2)   0.17(3)    8 e Uiso  0.03(1)    O
WO3  0.445(2)   0.727(3)   0.462(9)  0.44(2)    8 e Uiso  0.03(1)    O

```

\*Note: The WO site represents the center of gravity of the adsorbed water. A virtual atom consisting of one O atom and two H atoms was applied for all WO sites.

## The structural information of as-synthesized THK-2 in CIF format.

```

#####
# CRYSTAL DATA
#-----
data_VESTA_phase_1

_chemical_name_common          'as-synthesized THK-2'
_cell_length_a                 25.0376(6)
_cell_length_b                 14.3869(4)
_cell_length_c                 5.05369(8)
_cell_angle_alpha              90
_cell_angle_beta               90
_cell_angle_gamma              90
_cell_volume                   1820.41(8)
_space_group_name_H-M_alt      'P c c n'
_space_group_name_Hall         '-P 2ab 2ac'
_space_group_IT_number         56

loop_
_space_group_symop_operation_xyz
  'x, y, z'
  '-x, -y, -z'
  '-x+1/2, -y+1/2, z'
  'x+1/2, y+1/2, -z'
  '-x, y+1/2, -z+1/2'
  'x, -y+1/2, z+1/2'
  'x+1/2, -y, -z+1/2'
  '-x+1/2, y, z+1/2'

loop_
_atom_site_label
_atom_site_fract_x
_atom_site_fract_y
_atom_site_fract_z
_atom_site_occupancy
_atom_site_symmetry_multiplicity
_atom_site_Wyckoff_symbol
_atom_site_adp_type
_atom_site_U_iso_or_equiv
_atom_site_type_symbol
Si1  0.9536(2)  0.6855(3)  0.718(1)  1  8 e Uiso  0.0175(3)  Si
Si2  0.0723(2)  0.6121(3)  0.692(1)  1  8 e Uiso  0.0175(3)  Si
Si3  0.8989(1)  0.4974(3)  0.828(1)  1  8 e Uiso  0.0175(3)  Si
Si4  0.7816(1)  0.4320(3)  0.816(1)  1  8 e Uiso  0.0175(3)  Si
O1   0.9133(3)  0.6025(6)  0.773(2)  1  8 e Uiso  0.0204(6)  O
O2   0.7894(3)  0.3170(5)  0.796(2)  1  8 e Uiso  0.0204(6)  O
O3   0.8368(3)  0.4863(6)  0.786(2)  1  8 e Uiso  0.0204(6)  O
O4   0.0156(3)  0.6618(5)  0.742(2)  1  8 e Uiso  0.0204(6)  O
Zn1  0.8354(2)  0.2481(6)  0.561(1)  0.3894  8 e Uiso  0.030(1)  Zn
O5   0.1150(3)  0.6917(5)  0.699(3)  1  8 e Uiso  0.0204(6)  O
O6   0.7622(4)  0.4661(5)  0.102(2)  1  8 e Uiso  0.0204(6)  O
O7   0.9149(3)  0.4737(6)  0.125(2)  1  8 e Uiso  0.0204(6)  O
O8   0.9270(3)  0.4219(5)  0.621(2)  1  8 e Uiso  0.0204(6)  O
O9   0.9405(3)  0.7393(9)  0.436(2)  1  8 e Uiso  0.0204(6)  O
C1   0.8353      0.73903    0.71444    0.108    8 e Uiso  0.02(1)    C
C2   0.8381      0.84444    0.75685    0.108    8 e Uiso  0.02(1)    C
C3   0.78085     0.69461    0.78292    0.108    8 e Uiso  0.02(1)    C
C4   0.80084     0.89757    0.57137    0.108    8 e Uiso  0.02(1)    C
C5   0.73232     0.74267    0.6583     0.108    8 e Uiso  0.02(1)    C
C6   0.74591     0.91315    0.69597    0.108    8 e Uiso  0.02(1)    C
N7   0.71643     0.83071    0.77793    0.108    8 e Uiso  0.02(1)    N

```



|     |            |            |           |           |     |      |          |   |
|-----|------------|------------|-----------|-----------|-----|------|----------|---|
| H8  | 0.86852    | 0.7029     | 0.81431   | 0.108     | 8 e | Uiso | 0.02 (1) | H |
| H9  | 0.84473    | 0.72534    | 0.50636   | 0.108     | 8 e | Uiso | 0.02 (1) | H |
| H10 | 0.87907    | 0.86765    | 0.72058   | 0.108     | 8 e | Uiso | 0.02 (1) | H |
| H11 | 0.82517    | 0.85864    | 0.95928   | 0.108     | 8 e | Uiso | 0.02 (1) | H |
| H12 | 0.77575    | 0.68686    | 0.99591   | 0.108     | 8 e | Uiso | 0.02 (1) | H |
| H13 | 0.78193    | 0.62154    | 0.72515   | 0.108     | 8 e | Uiso | 0.02 (1) | H |
| H14 | 0.79582    | 0.86027    | 0.38094   | 0.108     | 8 e | Uiso | 0.02 (1) | H |
| H15 | 0.81859    | 0.96623    | 0.53677   | 0.108     | 8 e | Uiso | 0.02 (1) | H |
| H16 | 0.69729    | 0.69747    | 0.65965   | 0.108     | 8 e | Uiso | 0.02 (1) | H |
| H17 | 0.73946    | 0.74982    | 0.44312   | 0.108     | 8 e | Uiso | 0.02 (1) | H |
| H18 | 0.72113    | 0.94913    | 0.5494    | 0.108     | 8 e | Uiso | 0.02 (1) | H |
| H19 | 0.75281    | 0.95275    | 0.87623   | 0.108     | 8 e | Uiso | 0.02 (1) | H |
| H20 | 0.71912    | 0.8261     | 0.9804    | 0.108     | 8 e | Uiso | 0.02 (1) | H |
| WO  | 0.3062 (3) | 0.1570 (6) | 0.586 (1) | 0.832 (5) | 8 e | Uiso | 0.06333  | O |

\*Note: The WO site represents the center of gravity of the adsorbed water. A virtual atom consisting of one O atom and two H atoms was applied for all WO sites. Atomic coordinates for all C, H, N atoms were fixed at those obtained by the direct space method analysis. Occupancies for C, H, N atoms were fixed at 0.108 based on the result of CHN analysis.
